# Supplementary material
Source: publisher figshare collection journal article supplement (https://acs.figshare.com/ndownloader/files/4623868)

$^1\text{H}$  spectrum of compound **4**

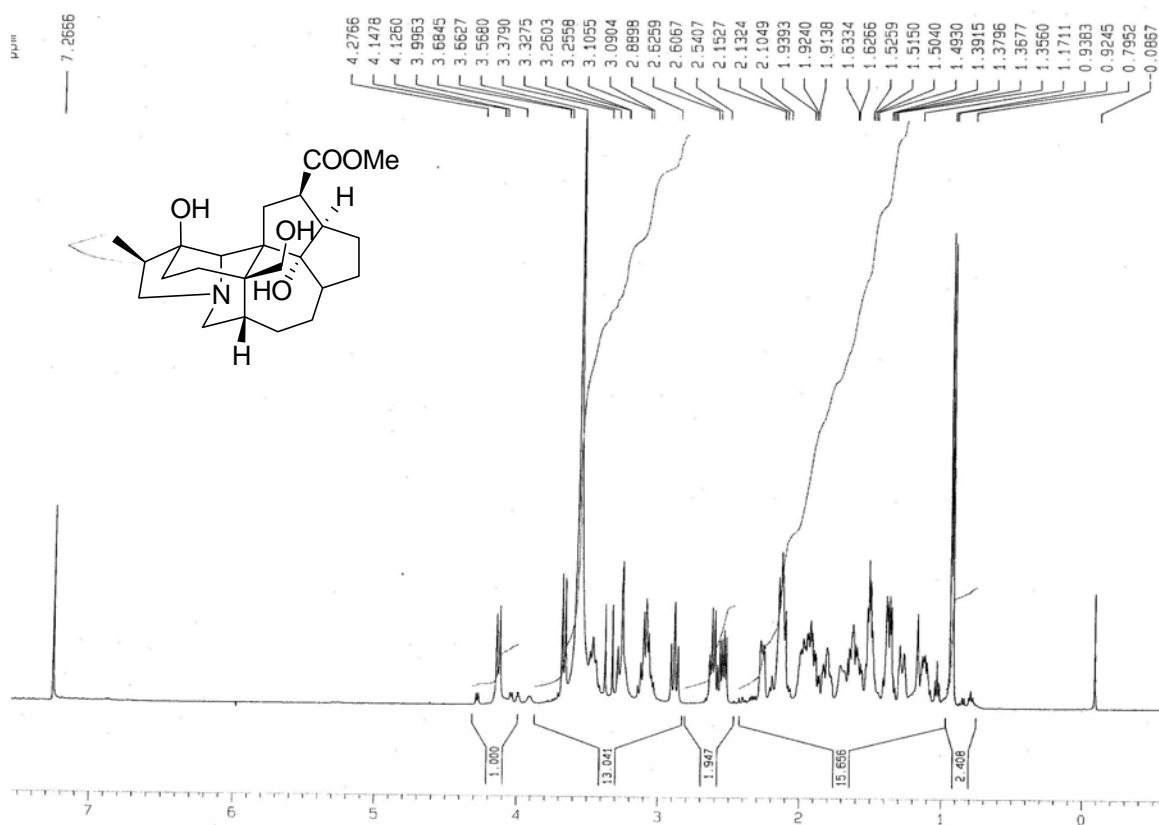

DEPT spectrum of compound **4**

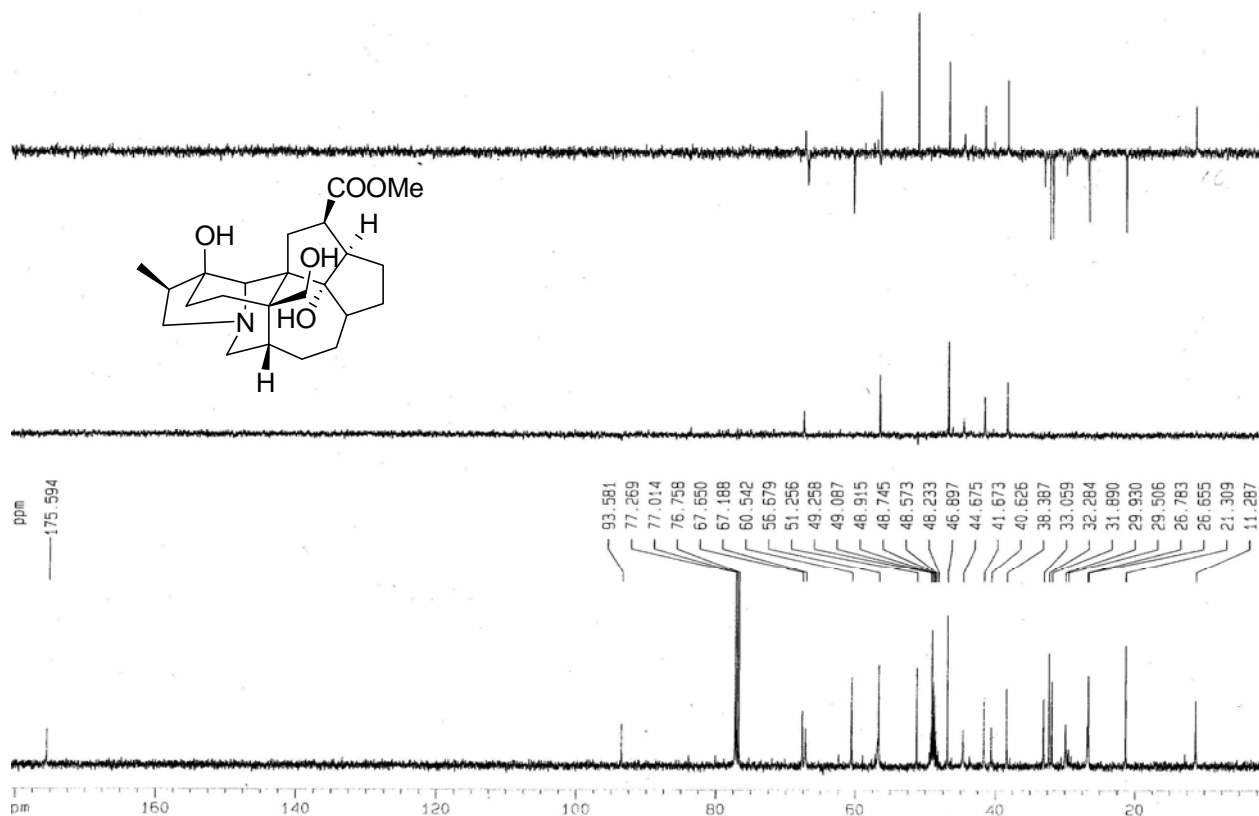

$^1\text{H}$ - $^1\text{H}$  COSY spectrum of compound 4

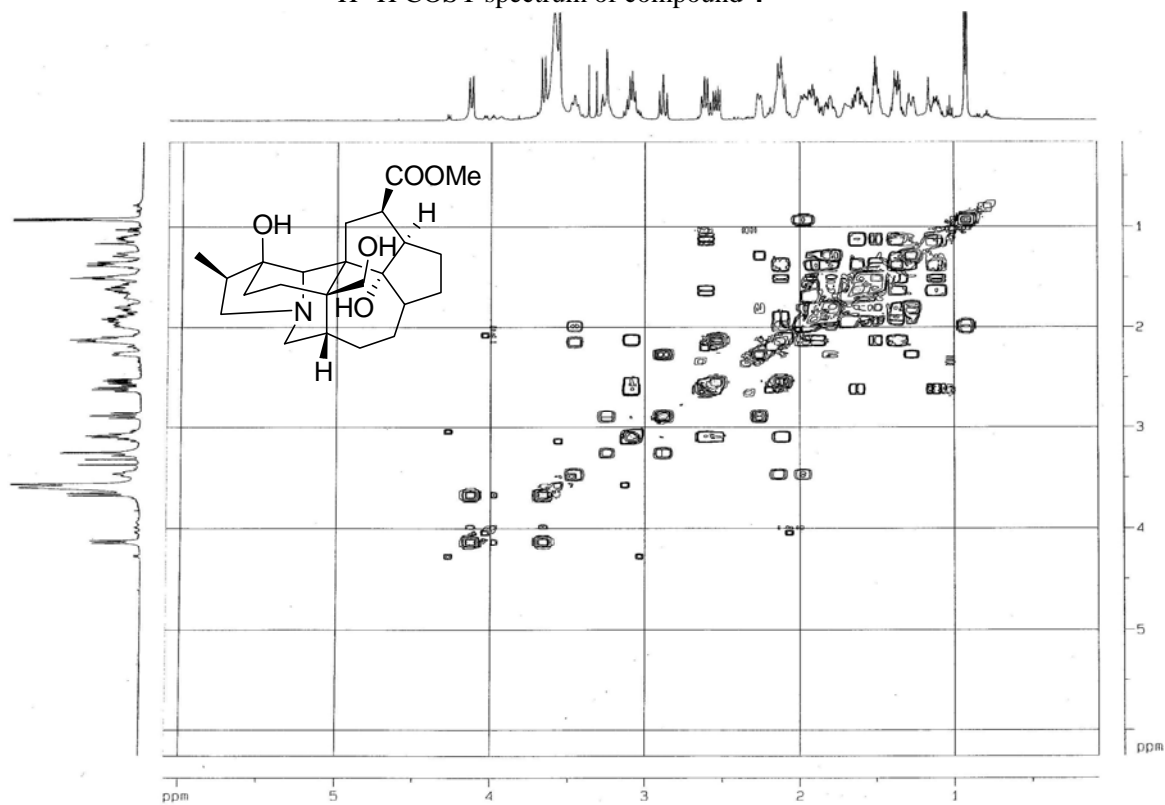

HSQC spectrum of compound 4

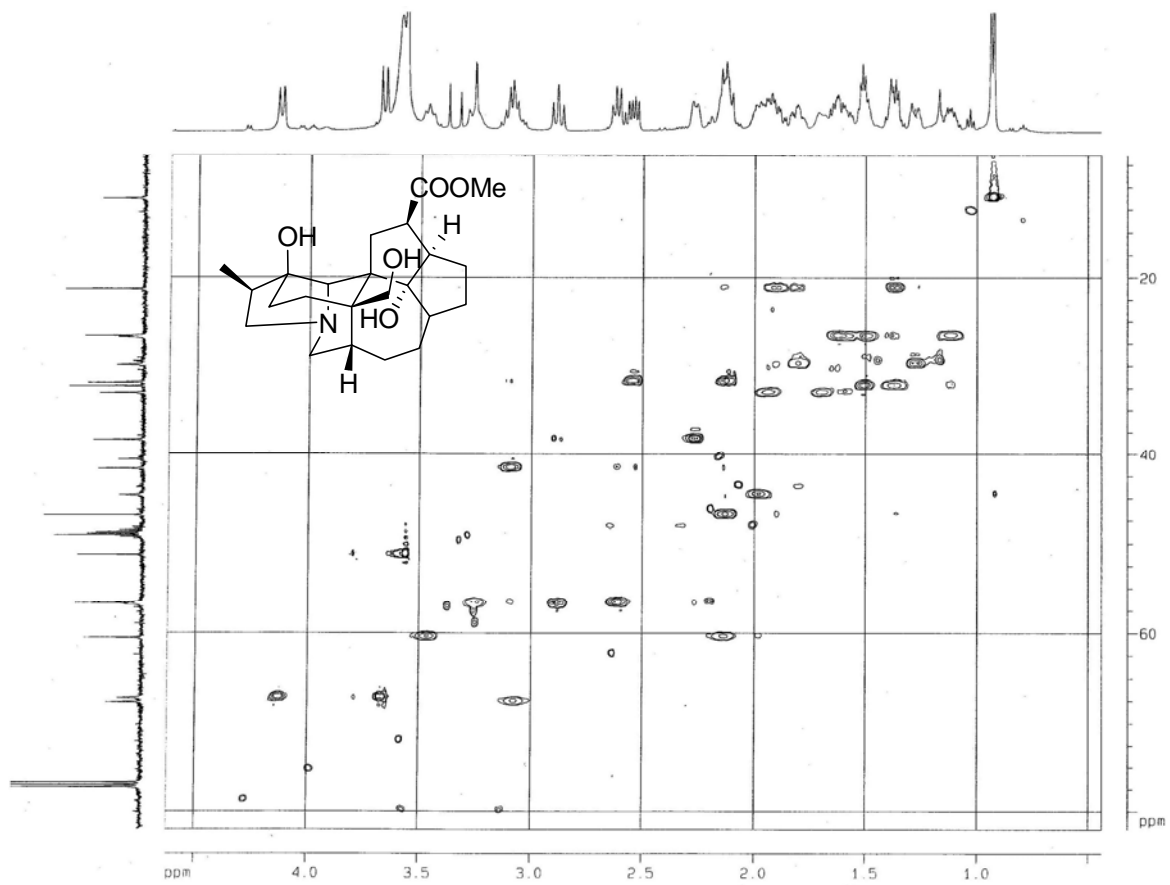

HMBC spectrum of compound **4**

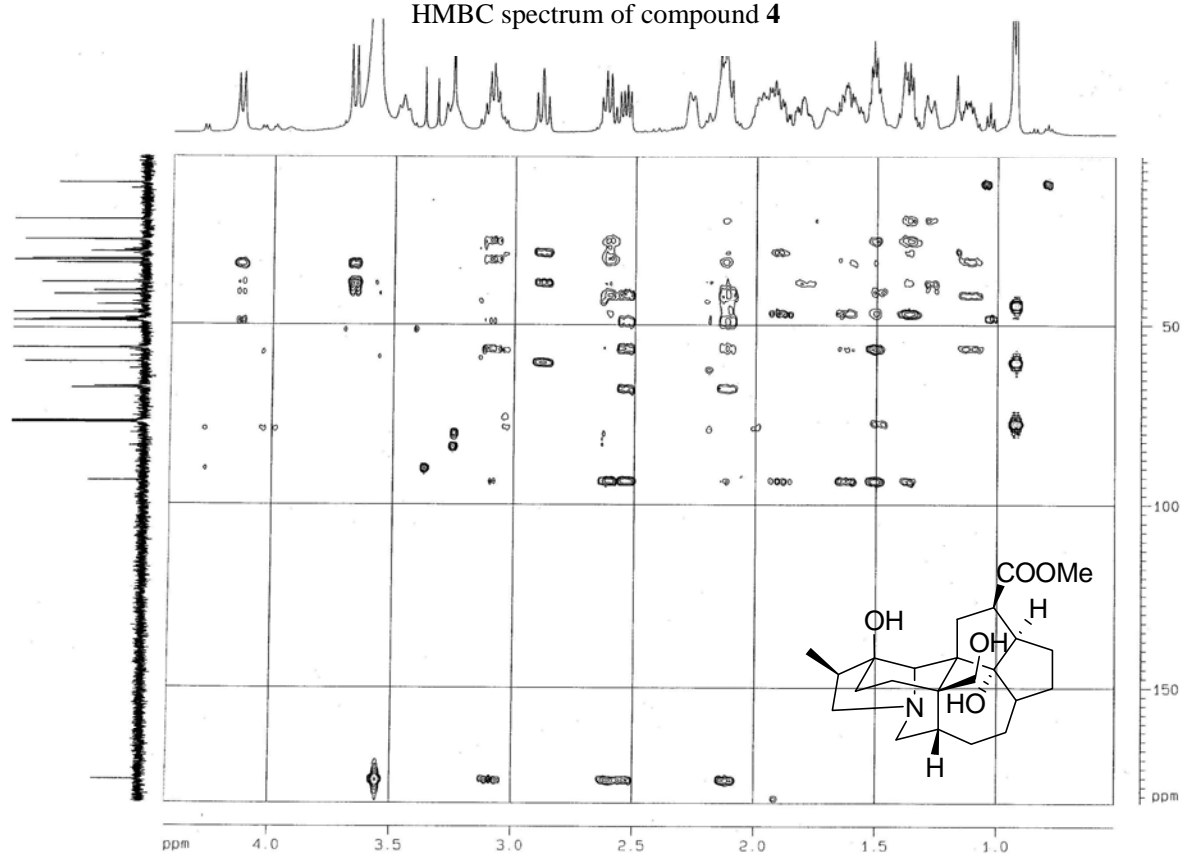

ROESY spectrum of compound **4**

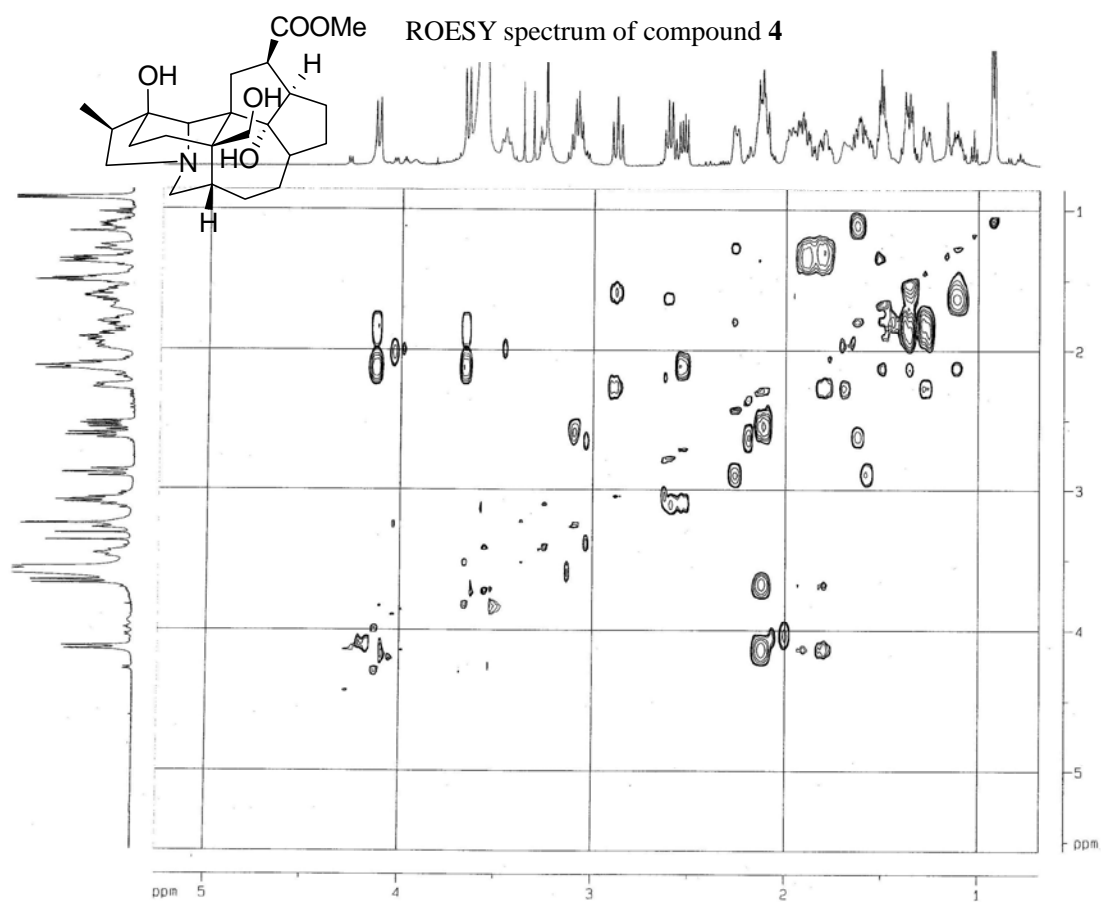

Supplement: Supplementary file 1 [file 4623868]
